# Supplementary material
Source: PubMed Central journal article supplement (PMC6118631)
Supplement: jci-128-121309-s392.pdf [file jci-128-121309-s392.pdf]

## SUPPLEMENTAL DATA

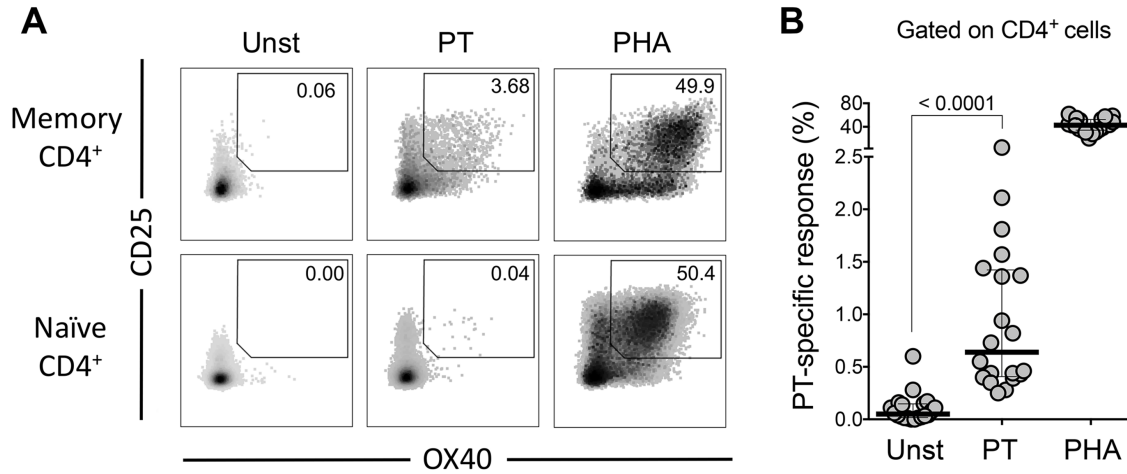

**Supplementary Figure 1. AIM<sub>25</sub> assay detects Pertussis-specific CD4<sup>+</sup> T cells.** (A) Representative flow cytometry plots of CD25+OX40<sup>+</sup> upregulation by CD4<sup>+</sup> T cells in naïve (CD45RA+CCR7<sup>+</sup>; lower panel) and antigen-experienced memory (excluding naïve cells; upper panel) cells left unstimulated (Unst) or stimulated with pertussis-megapool [PT (MP)] or PHA as a positive control. (B) CD25+OX40<sup>+</sup> expression by CD4<sup>+</sup> memory T cells after 24 hours. Each dot represents one donor (n=20) originally primed with DTwP vaccine and not recently boosted. Data are expressed as median ± the interquartile range for each condition and comparison analyzed via Mann-Whitney unpaired t-test.

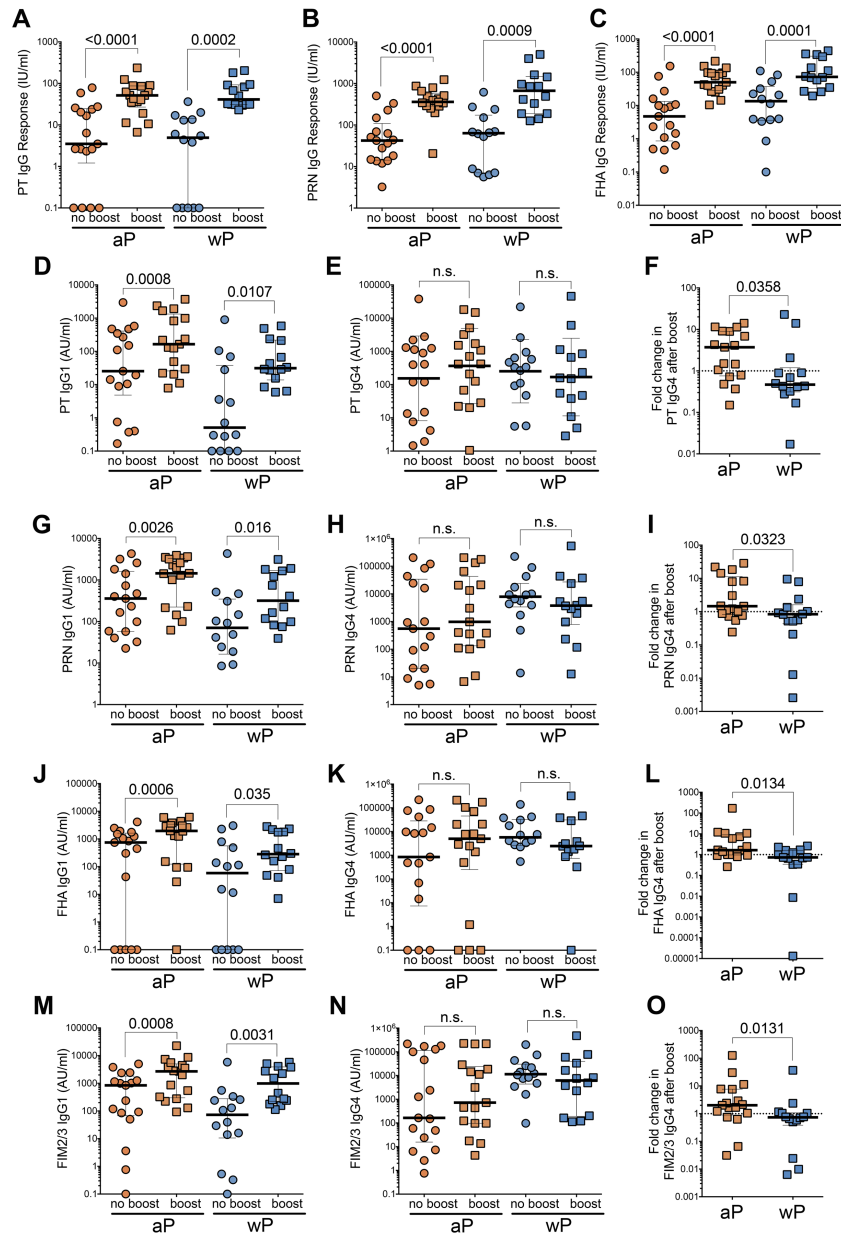

**Supplementary Figure 2. Individual aP antigen antibody profiles of aP and wP donors.** Total (A) PT, (B) PRN and (C) FHA-specific IgG titers represented as IU/ml for each cohort pre- and post-aP boost. (D-F) PT-specific, (G-I) PRN-specific, (J-L) FHA-specific, (M-O) FIM2/3-specific IgG1, IgG4 and fold change in IgG4 levels after aP boost for each cohort. Pre- and post-response for each cohort analyzed via Wilcoxon paired t-test. Comparison between aP and wP pertussis-specific IgG4 fold change analyzed via Mann-Whitney unpaired t-test. For all panels data are expressed as median  $\pm$  the interquartile range for each cohort and each data point represents a single donor (n=19 for aP and n=14 for wP cohorts).

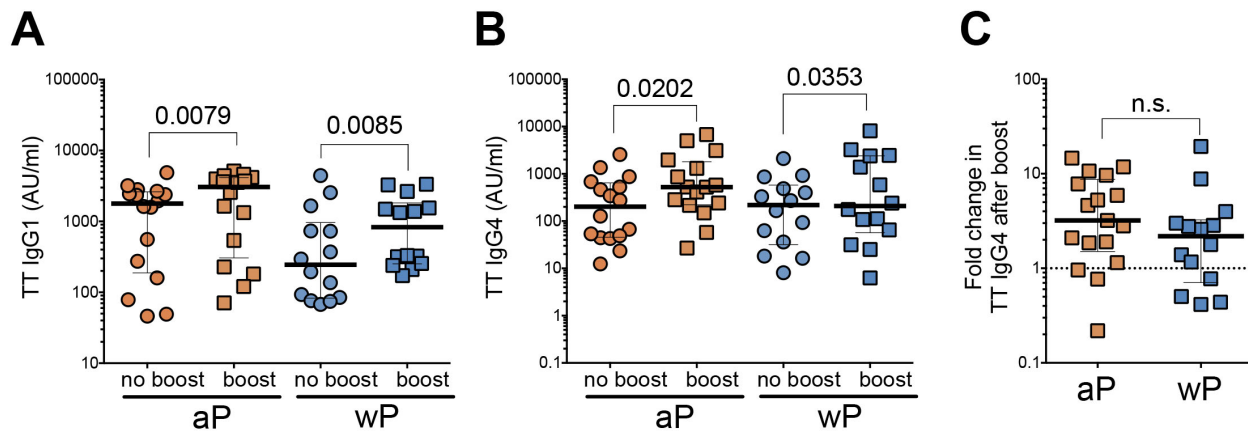

**Supplementary Figure 3. TT IgG1 and IgG4 antibody profiles of aP and wP donors are similar.** (A) IgG1 and (B) IgG4 TT-specific antibody levels of aP and wP donors pre- and post- aP boost. Pre- and post- boost comparison was evaluated via Wilcoxon paired t-test (C) Fold change in TT-specific IgG4 from pre- to post-aP boost. Comparison between aP and wP fold change analyzed via Mann-Whitney unpaired t-test. For all panels data are expressed as median  $\pm$  the interquartile range for each cohort and each data point represents a single donor (n=19 for aP and n=14 for wP cohorts).

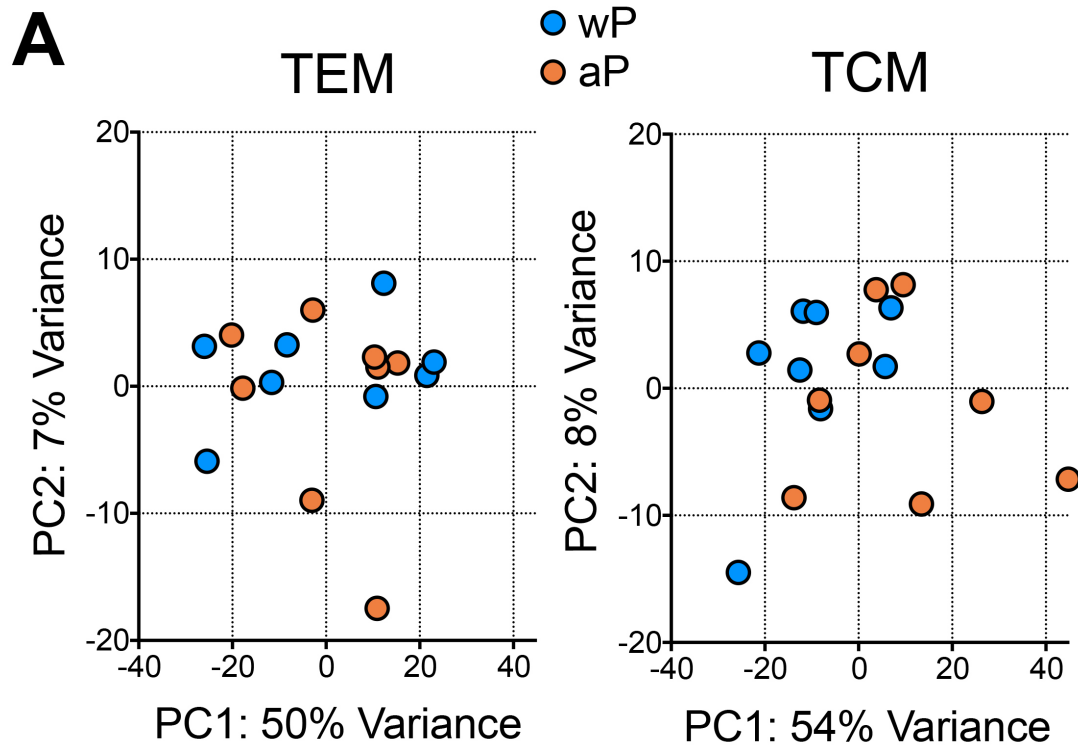

**Supplementary Figure 4. Comparison of gene expression profiles of TT stimulated T cells for aP and wP donors.** (A) TEM or TCM cells from aP and wP donors have undistinguishable transcriptomic profiles after TT-specific stimulation, based on the expression of the top 1000 variable genes. Each data point represents a single donor (n=8 for each cohort).

**Supplementary Table 1a.** Characteristics of the donor population in a cross-sectional cohort

| <b>Cohort</b> | <b>No. Samples</b> | <b>Age (range)</b> | <b>Childhood Priming Vaccine</b> | <b>Boost Vaccine</b> | <b>Time Since Boost (mo)</b> |
|---------------|--------------------|--------------------|----------------------------------|----------------------|------------------------------|
| wP/no boost   | 20                 | 38 (24-64)         | DTwP                             | n/a                  | n/a                          |
| wP/boost      | 22                 | 34 (21-51)         | DTwP                             | Tdap                 | 1-3                          |
| aP/boost      | 18                 | 19 (18-21)         | DTaP                             | Tdap                 | 1-3                          |

**Supplementary Table 1b.** Characteristics of the donor population in a 1st longitudinal cohort

| <b>Cohort</b> | <b>No. Samples</b> | <b>Age (range)</b> | <b>Childhood Priming Vaccine</b> | <b>Boost Vaccine</b> | <b>Time Since Boost (mo)</b> |
|---------------|--------------------|--------------------|----------------------------------|----------------------|------------------------------|
| wP/no boost   | 18                 | 28 (22-54)         | DTwP                             | n/a                  | n/a                          |
| wP/aP boost   | 18                 | 28 (22-54)         | DTwP                             | Tdap                 | 0.5-12                       |
| aP/no boost   | 15                 | 19 (18-20)         | DTaP                             | n/a                  | n/a                          |
| aP/aP boost   | 15                 | 19 (18-20)         | DTaP                             | Tdap                 | 0.5-12                       |

**Supplementary Table 1c.** Characteristics of the donor population in a 2nd longitudinal cohort

| <b>Cohort</b> | <b>No. Samples</b> | <b>Age (range)</b> | <b>Childhood Priming Vaccine</b> | <b>Boost Vaccine</b> | <b>Time Since Boost (days)</b> |
|---------------|--------------------|--------------------|----------------------------------|----------------------|--------------------------------|
| wP/no boost   | 24                 | 29 (21-35)         | DTwP                             | n/a                  | n/a                            |
| wP/aP boost   | 24                 | 29 (21-35)         | DTwP                             | Tdap                 | 1-180                          |
| aP/no boost   | 20                 | 19 (18-20)         | DTaP                             | n/a                  | n/a                            |
| aP/aP boost   | 20                 | 19 (18-20)         | DTaP                             | Tdap                 | 1-180                          |

**Supplementary Table 2. List of individual peptides of each megapool.**

| <b>Pertussis (132 peptides)</b> | <b>Tetanus (125 peptides)</b> | <b>CMV/EBV (122 peptides)</b> |
|---------------------------------|-------------------------------|-------------------------------|
| <b>Sequence</b>                 | <b>Sequence</b>               | <b>Sequence</b>               |
| GADLIANPNGISVNG                 | PITINNFYSDPVNNDTIIM           | VKLTMEYDDKVKSKH               |
| VVARLVKLQGAUSSKQ                | IYYKAFKITDRIWIVPERYE          | PRSPTVFYNIIPMPLPPSQL          |
| GKPLADIAVVAGANRY                | DPNYLRTDSDKDRFL               | LTAYHVVSTAPTGSWF              |
| VVAGANRYDHATRRAT                | TDSKDRFLQTMVKL                | IIFIFRRDLLCPLGAL              |
| DHATRRATPIAAGARG                | RFLQTMVKLFNRIKN               | PAQPPPGVINDQQLHHLPSG          |
| SSDSGLGVRQLGSLSS                | VKLFNRKNNVAGEALLDKI           | GGSIQTNFKSLSTEF               |
| RQLGSLSSPSAITVSS                | AMLTNLIIFGPGPVLNKNEV          | VFLQTHIFAEVLKDAIKDLV          |
| GQVRATSAGAMTVRDV                | PALLMHELIHVLHGLYGMQ           | EDLPCIVSRGGPKVKRPIF           |
| GFLKSAGAMTVNGRDA                | QEIYMQHTYPISAEELFTFG          | KTSLYNLRRGIALAIPQCRL          |
| VRLDGAHAGGQLRVSS                | LFTFGGQDANLISIDIKNDL          | GPWVPEQWMFQGAPPSQGTD          |
| VAELKSLDNISVTGGE                | IKNDLYEKTLDYKAIANKL           | PHDITPYTARNIRDAACRAV          |
| NISVTGGERVSVQSVN                | LKSEYKQNMVRVNTNAFRNV          | TDDSGHESDSNSNEGRH             |
| RVSQSVNSASRVAIS                 | AFRNVDSGSLVSKLIG              | NPKFENIAEGLRALLARSHV          |
| IDVRGGSTVAANSLHA                | TKNKPLNFNYSLDKIIVDYN          | SNPKFENIAEGLRVLLARSH          |
| RSMTLGIVDTTGDLQA                | IVDYNLQSKITLPNDRTPV           | VYGGSKTSLYNLRRGTALAI          |
| SASRARIDSTGSVIG                 | LQRITMTNSVDDALINSTKI          | SDELPHYIDPNMEPV               |
| KVAKKLFLNGTLRAVN                | NSTKIYSYFPSVISKVNQGA          | LRALLARSHVERTTD               |
| SVVSDAALVADGGPIV                | VNQGAQGILFLQWVRDIIDD          | PTCNIKATVCSFDDGVDLPP          |
| QRIEAQRIENRGTFQS                | VRDIIDDFTNESSQKT              | PQCRLTPLSRLPFGM               |
| AAQVTQRGGAANLTSR                | IDKISDVSTIVPYIGPALNI          | KTSLYNLRRGTALAIQCRL           |
| HDTRFSNKIRLMGPLQ                | PALNIVKQGYEGNFIGALET          | SRDELLHTRAASLLY               |
| IRLMGPLQVNAGGAVS                | GALETTGVVLLLEYIPEITL          | VYGGSKTSLYNLRRGIALAV          |
| TSRGGFDNEGKMESNK                | LEKRYEKWIEVYKLVKAKWL          | PSMPFASDYSQGAFT               |
| FTVQAQRIDNSGTMAA                | SYQMYRSLEYQVDAIKKIID          | QQRPVMFVSRVPAKK               |
| PHLRNTGQVVAGHDIH                | RESSRSFLVNQMINEAKKQL          | SGHESDSNSNEGRHH               |
| VVAGHDIHIINSKLE                 | AKKQLLEFDTQSKNILMQYI          | AQEILSDNSEISVFPK              |
| IINSKLENTGRVDAR                 | QYIKANSKFIGITEL               | ENIAEGLRVLLARSHVERTT          |
| NDIALDVADFTNTGSL                | NLDINNDIISDISGFNSSVI          | RPFHPVGEADYFEY                |
| DFTNTGSLYAEHDATL                | INGKAIHLVNNESSEVIVHK          | PPVVRMFMRRERQLPQ              |
| ILPVAEGTLRVKAKSL                | FNNFTVSFWLRVPKV               | DGEPDMPPGAIEQGPADDPG          |
| LRVKAKSLTTEIETGN                | SFWLRVPKVSASHLE               | APGPGPQGPLRESIVCYFM           |
| PGSLIAEVQENIDNKQ                | ASHLEQYGTNEYSISSMKK           | PQCFWEMRAGREITQ               |
| VANEANALLWAAGELT                | SSMKKHSLSIGSGWSVSLKG          | RRPQKRPSICIGCKGT              |

LWAAGELTVKAQNITN  
VKAQNITNKRAALIEA  
AVALLNKLGRIRAGED  
MHLDAPRIENTAKLSG  
GKKAGTIAAPWYGGDL  
VGKDLYLNAGARKDEH  
ELLDYLLDQNRYEYIW  
QNRYEYIWGLYPTYTE  
RGHTLESAEGRKIFGE  
EGRKIFGEYKKLQGEY  
GGMDAETKEVDGIIQE  
EVDGIIQEFAADLRTV  
FAADLRTVYAKQADQA  
VAQRYKSQIDAVRLQA  
IDAVRLQAIQPGRVTL  
IQPGRVTLAKALSAAL  
GAEIAFYKPEQTVLAA  
GAIHNGENAAQNRGRP  
DALAAVLVNPPIFTRI  
NPHIFTRIGAAQTSLA  
LASLASLDAAQGLEVS  
AARVAGDNYFDLTLVR  
GKPLADIAVIAGANRY  
HADDGTIVITGTITDT  
VQVRISNLNDSKITMG  
TMRYLASVVKKNGDVE  
EASAITTYVGFVSVYP  
ANDGTIVITGSISDQT  
FRLANLNGQHIRMGTD  
SKSYTLRYLASVVKKP  
DAAQITSYVGFVSVYP  
TTLAMALGALGAAPAA  
ALGAAPAAHADWNNQS  
HADWNNQSIVKTGERQ  
IVKTGERQHGIHIQGS  
HGIHIQGSDPGGVRTA  
GRQAQGILLENPAAEL  
GIRRLGTVTVKAGKL  
VTVKAGKLVADHATLA  
NVGDTWDDDGIALYVA

AGEVRQITFRDLDPKFNAYL  
FNAYLANKWVFITITNDRLS  
MGSAEITGLGAIREDNITL  
YVSIDKFRIFCKALNPKEIE  
PKEIEKLYTSYLSITFLRDF  
TNGKLNIIYRRLYNGLKFI  
LKFIKRYTPNNEIDSFVKS  
SFVKSGDFIKLYVSYNNNEH  
LKTYSVQLKLYDDKNASLGL  
HLKDKILGCDWYFVPT  
GCDWYFVPTDEGWTND  
NDTIIMMEPPYCKGL  
YCKGLDIYKAFKIT  
DIYKAFKITDRIWI  
DSDKDRFLQTMVKLF  
ALLDKIINAIPYLG  
IINAIPYLGNSYSLL  
PYLGNSYSLLDKFDT  
SAMLNLIIFGPGPV  
VRGIVLRVDNKNYFP  
CRDGFSGSIMQMAFCP  
MAFCPEYVPTFDNVI  
FDNVIENTSLTIGK  
ENITSLTIGKSKYFQ  
SKYFQDPALLMHEL  
IHVLHGLYGMQVSSH  
GLYGMQVSSHEIIPS  
LNDYKAIANKLSQVT  
NIDIDSYKQIYQQKY  
SNGQYIVNEDKFQIL  
IVNEDKFQILYNSIM  
KFQILYNSIMYGfte  
IELGKKFNKTRLSY  
KFNKTRLSYFSMNH  
TRLSYFSMNHDPVKI  
IGLCKKIIPPTNIRE  
KNEDLTFIAEKNSFS  
DEIVSYNTKNKPLNF  
NYSLDKIIVDYNLQS  
EYKSNAASTIEIHNI

MVFLQTHIFAEVLKD  
STVVTATGLALSLLL  
NRGWMQRIRRRRRRR  
ILCFVMAARQRLQDI  
VLKDAIKDLVMTKPAPTCNI  
VPPGAIEQGPADDPGEGPST  
DGGRRKGGWFGKHR  
RVTVCSFDDGVDLPPWFPPM  
VLVMLVLLILAYRRRWRLT  
SSYAAAQRKLLTPV  
TDGGGGHSHDSGHGG  
LWRLGATIWQLLAF  
QKRAAPPTVSPSDTG  
ALSTPFLMEHTMPVTHPPEV  
NIEFFTKNSAFKKT  
VKQIKVRVDMVRHRI  
KGIQIYTRNHEVKS  
PEPFTIQRNKIID  
PWQAGILARNLVPMV  
RQYDPVAALFFFDIDL  
ACTSGVMTRGRLKAE  
MQLIPDDYSNTHSTRYVTVK  
FKVIIKPPVPPAPIM  
KTRPFKVIKPPVP  
AGILARNLVPMVATV  
LRQYDPVAALFFFDI  
GPQYSEHPTFTSQYRI  
TSQYRIQGKLEYRHT  
KYQEFFWDANDIYRIFAE  
GQNLKYQEFFWDANDIYRIF  
IIPKPKISHIMLDVA  
HETRLQLTGIVRVSQPSL  
GPQYSEHPTFTSQYRIQGKL  
HPTFTSQYRIQGKLE  
EPDVYYSYSAFVFTK  
PPWQAGILARNLVPM  
MLDVAFTSHEHFGLLCPKSI  
KPGKISHIMLDVAFTSHEHF  
IIPKPKISHIMLDVAFTSHE  
ARAKKDELRRKMMY

DGIALYVAGEQAQASI  
GEQAQASIADSTLQGA  
ADSTLQGAGGVQIERG  
GGVQIERGANVTVQRS  
ANVTVQRS AIVDGGGLH  
PEDLPPSRVVL RDNTV  
VVLRDTNVTAVPASGA  
TAVPASGAPAAVSVLG  
GHITGGRAAGVAAMQG  
AGVAAMQGA VVHLQRA  
AVVHLQRATIRRGDAP  
TIRRGDAPAGGAVPGG  
AGGAVPGGAVPGGAVP  
AVPGGAVPGGFGPGGF  
GPVLDGWYGV DVS GSS  
VELAQ SIVEAPELGAA  
EAPELGAAIRVGRGAR  
SAPHGNVIETGGARRF  
ETGGARRFAPQAAPLS  
APQAAPLSITLQAGAH  
AQGKALLYRVLPEPVK  
SIGPLDVALASQARWT  
LASQARWTGATRAVDS  
GATRAVDSL SIDNATW  
LSIDNATWVMTDNSNV  
AEAGRFKVLT VNTLAG  
LTVNTLAGSGLFRMN  
RNSGSEPASANTLLL  
PAGRELSAAANA AVNT  
LFDDGIRRF LGTVTK  
AGGGVPGGAVPGGAVP  
VYRYDSRPPEDVFQNG  
NVLDHLTGRSCQVGSS  
NSAFVSTSSRRYTEV  
SSRRYTEVYLEHRMQE  
YLEHRMQEAVEAERAG  
SYFEYVDTYGDNAGRI  
YGDNAGRILAGALATY  
LAGALATYQSEYLAHR  
QSEYLAHRRIPPENIR

DDNTIYQYLYAQKSP  
YQYLYAQKSPTTLQR  
SVDDALINSTKIYSY  
LFLQWVRDIIDFTN  
TIVPYIGPALNIVKQ  
VLLLEYIPEITLPVI  
YIPEITLPVIAALSI  
TLPVIAALSIAESST  
QKEKIIKTIDNFLEK  
IKTIDNFLEKRYEKW  
IEVYKLVKAKWLGTV  
LVKAKWLGTVNTQFQ  
WLGTVNTQFQKRSYQ  
NTQFQKRSYQMYRSL  
EYQVDAIKKIIDYEY  
AIKKIIDYEYKIYSG  
ANKAMININIFMRES  
ININIFMRESSRSL  
FMRESSRSLVNQMI  
VNQMINEAKKQLLEF  
DTQSKNILMQYIKAN  
NILMQYIKANSKFIG  
SKFIGITELKKLESK  
ITELKKLESKINKVF  
KLESKINKVFSTPIP  
INKVFSTPIPFYSYK  
DIDVILKKSTILNLD  
LKKSTILNLDINNDI  
ISDISGFNSSVITYP  
GFNSSVITYPDAQLV  
SEVIVHKAMDIEYND  
IEYNDMFNNFTVSFW  
MFNNFTVSFWLRVPK  
TVSFWRVLPKVSASH  
LRVPKVSASHLEQYG  
TNEYSIISSMKKHS  
WVFITITNDRLSSAN  
ITNDRLSSANLYING  
LYINGVLMGSAEITG  
TSYLSITFLRDFWGN

RRIEEICMKVFAQYI  
LPLKMLNIPSINVHHYPSAA  
ARNLVPMVATVQGGQN  
FTSQYRIQGKLEYRH  
MDDLPLNVGLPIIGVMLVLI  
MTRNPQPFMRPHERNGFTVL  
EDKREMWMACIKELH  
TLGSDVEEDLTMTRN  
RPHERNGFTVLCPKN  
TERKTPrvtGGGAMA  
KDELRRKMMYMCYRN  
AANKLGGALQAKARA  
TRATKMQVIGDQYVKVYLES  
TERKTPrvtGGGAMAGAST  
DQYVKVYLESFCEDVPSGKL  
GQNLKYQEFFWDAND  
DESDNEIHNPVFTW  
KLFMHVTLGSDVEEDLTMTR  
DDVWTS GSDSDEELV  
ASTSAGRKRKSASSA  
ANDIRIFAELEGVW  
QTMLRKEVNSQLSLG  
KDVALRHVVCAHELVCSMEN  
MSIYVYALPLKMLNI  
TLGSDVEEDLTMTRNPQPFM  
AHELVCSMENTRATKMQVIG  
GSDSDEELVTTERKTPrvtG  
EQSDEEEEEGAQEER  
VKSEPVSEIEEVAPE  
PVSEIEEVAPEEEEE  
LVKQIKVRVDMVRHR  
EPDVYYTS AFVFP TKDVAL  
MISVLGPISGHV LKAVFSRG  
FCEDVPSGKLFMHVTLGSDV  
TRQQNQWKEPDVYYT  
KEHMLKKYTQTEEF  
AFVFP TKDVALRHVV  
LVSQYTPDSTPCHRG  
YRNIEFFTKNSAFPK  
YRIQGKLEYRHTWDR



RIPPENIRRVTRVYHN  
RVTRVYHNGITGETTT  
GITGETTTTEYSNARY  
PNPYTSRRSVASIVGT  
WSERAGEAMVLVYYES  
GEAMVLVYYESIAYSF  
SVASIVGTLVRMAPVM  
YYSNVTATRLLSSTNS  
RLCAVFVRSQPVIGA  
SGQPVI GACTSPYDGK  
CTSPYDGKYWSMYSRL  
YWSMYSRLRKMLYLIY  
RKMLYLIYVAGISVRV  
HVSKEEQYYDYEDATF  
TQHGPSYGR CANKTRA  
HYYSKVTATRLLASTN  
SRLCAVFVRDGQSVIG  
VHVSKEEQYYDYEDAT  
VYKYDSRPPEDVFQNG

ITFLRDFWGNPLRYD  
DFWGNPLRYDTEYYL  
TEYYLIPVASSSKDV  
TDYMYLTNAPSYTNG  
IKLYVSYNNNEHIVG  
NAFNNLDRILRVGYN  
LDRILRVGYNAPGIP  
APGIPLYKKMEAVKL  
LYKKMEAVKLRDLKT  
EAVKLRDLKTYSVQL  
RDILIASNWYFNHLK  
ASNWYFNHLKDKILG

MSIYVYALPLKMLNIPSIN  
EEAIVAYTLATAGVS  
RKEVNSQLSLGDPLF  
ESDEEEAIVAYTLAT  
CNENPEKDVLAELVK  
RHRIKEHMLKKYTQT  
HETRLLQTGIHVRVS  
ENSDQEESEQSDEEE  
RNGFTVLCPKNMIK

**Supplementary Table 3.** List of antibodies used in the study

| <b>Antibody</b> | <b>Fluorochrome</b> | <b>Clone</b> | <b>Host</b>    | <b>Vendor</b>  | <b>Catalog #</b> |
|-----------------|---------------------|--------------|----------------|----------------|------------------|
| Bcl-2           | BV421               | 100          | mouse          | BioLegend      | 658709           |
| BTLA            | APC                 | M5E2         | mouse          | BioLegend      | 344509           |
| CCR7            | PerCP/Cy5.5         | G043H7       | mouse          | BioLegend      | 353220           |
| CD14            | V500                | M5E2         | mouse          | BD Biosciences | 561391           |
| CD152           | PE Cy7              | L3D10        | mouse          | BioLegend      | 349914           |
| CD178           | PE                  | NOK-1        | mouse          | BioLegend      | 306406           |
| CD19            | V500                | HIB19        | mouse          | BD Biosciences | 561121           |
| CD25            | FITC                | M-A251       | mouse          | BD Biosciences | 555431           |
| CD25            | PerCPCy5.5          | BC96         | mouse          | BioLegend      | 302626           |
| CD27            | APC                 | O323         | mouse          | eBioscience    | 17-0279-42       |
| CD28            | PE Cy7              | CD28.2       | mouse          | BD Biosciences | 560684           |
| CD3             | AF700               | UCHT1        | mouse          | eBioscience    | 56-0038-42       |
| CD4             | APCef780            | RPA-T4       | mouse          | eBioscience    | 47-0049-42       |
| CD45RA          | ef450               | HI100        | mouse          | eBioscience    | 48-0458-42       |
| CD45RO          | FITC                | UCHL1        | mouse          | eBioscience    | 11-0457-42       |
| CD69            | BV605               | FN50         | mouse          | BD Biosciences | 562989           |
| CD71            | PE/Cy7              | CY1G4        | mouse          | BioLegend      | 334112           |
| CD8             | V500                | RPA-T8       | mouse          | BD Biosciences | 560774           |
| IFNg            | APC                 | 4S.B3        | mouse          | eBioscience    | 17-7319-82       |
| IL-17           | PE                  | eBio64DEC17  | mouse          | eBioscience    | 12-7179-42       |
| IL-17           | PE-Cy7              | eBio64DEC17  | mouse          | eBioscience    | 25-7179-42       |
| IL-4            | BV605               | MP4-25D2     | rat            | BioLegend      | 500828           |
| IL-9            | PerCP/Cy5.5         | MH9A4        | mouse          | BioLegend      | 507610           |
| IL-9            | PE                  | MH9D1        | mouse          | eBioscience    | 12-7098-42       |
| KLRG1           | BV605               | 2F1/KLRG1    | Syrian Hamster | BioLegend      | 138419           |
| OX40            | PE/Cy7              | Ber-ACT35    | mouse          | BioLegend      | 350012           |
| OX40            | BV421               | Ber-ACT35    | mouse          | BioLegend      | 350014           |
| PD-1            | BV605               | EH12.1       | mouse          | BD Biosciences | 563245           |
| PD-L1           | PE                  | 29E.2A3      | mouse          | BioLegend      | 329706           |
| Tim3            | BV605               | F38-2E2      | mouse          | BioLegend      | 345018           |
